# Supplementary material for: A Novel Lipase from Streptomyces exfoliatus DSMZ 41693 for Biotechnological Applications
Source: MDPI journal article supplement (doi:10.3390/ijms242317071), 2023-12-02
Supplement: s1 [file s1]

## A novel lipase from *Streptomyces exfoliatus* DSMZ 41693 for biotechnological applications

Guillermo Rodríguez-Alonso<sup>1 #</sup>, Juan Toledo-Marcos<sup>1 † #</sup>, Lara Serrano-Aguirre<sup>1 ‡</sup>, Carlos Rumayor<sup>1</sup>, Beatriz Pasero<sup>1 §</sup>, Aida Flores<sup>2</sup>, Ana Saborido<sup>1</sup>, Pilar Hoyos<sup>2</sup>, María J. Hernáiz<sup>2</sup>, Isabel de la Mata<sup>1 \*</sup>, Miguel Arroyo<sup>1 \*</sup>

<sup>1</sup> Department of Biochemistry and Molecular Biology, Faculty of Biology, Universidad Complutense de Madrid (UCM), E-28040 Madrid (Spain); [guillr05@ucm.es](mailto:guillr05@ucm.es) (G.R.-A.); [juan.toledo-marcos@medunigraz.at](mailto:juan.toledo-marcos@medunigraz.at) (J. T.-M.); [lara.serrano@cib.csic.es](mailto:lara.serrano@cib.csic.es) (L.S.-A.); [carlorum@ucm.es](mailto:carlorum@ucm.es) (C.R.); [beatriz.pasero@cib.csic.es](mailto:beatriz.pasero@cib.csic.es) (B.P.); [asaborid@ucm.es](mailto:asaborid@ucm.es) (A.S.).

<sup>2</sup> Department of Chemistry in Pharmaceutical Sciences, Faculty of Pharmacy, Universidad Complutense de Madrid (UCM), E-28040 Madrid (Spain); [aiflores@ucm.es](mailto:aiflores@ucm.es) (A.F.); [phoyosvi@ucm.es](mailto:phoyosvi@ucm.es) (P.H.); [mjhernai@ucm.es](mailto:mjhernai@ucm.es) (M.J.H.).

<sup>†</sup> Present address: Gottfried Schatz Research Center, Medical Physics and Biophysics, Medical University of Graz, Neue Stiftingtalstraße 6/III, A-8010 Graz (Austria).

<sup>‡</sup> Present address: Polymer Biotechnology Group, Department of Microbial & Plant Biotechnology, Center for Biological Research (CIB), Spanish National Research Council (CSIC), c/ Ramiro de Maeztu 9, E-28040 Madrid (Spain).

<sup>§</sup> Present address: Environmental Biotechnology Group, Department of Microbial & Plant Biotechnology, Center for Biological Research (CIB), Spanish National Research Council (CSIC). c/ Ramiro de Maeztu 9, E-28040 Madrid (Spain).

<sup>#</sup> These authors contributed equally to this work.

<sup>\*</sup> Correspondence: [ldlmata@ucm.es](mailto:ldlmata@ucm.es) (I.d.l.M.); [marroyos@ucm.es](mailto:marroyos@ucm.es) (M.A.). Tel.: +34-913944150. These two researchers share the position of last author.

**Table S1.** Strains, plasmids, and oligonucleotides used in this study.

| Strain                                              | Relevant description or sequence                                                                                                                                                                                                                                                               | Reference  |
|-----------------------------------------------------|------------------------------------------------------------------------------------------------------------------------------------------------------------------------------------------------------------------------------------------------------------------------------------------------|------------|
| <i>Streptomyces exfoliatus</i> DSMZ 41693           | Producer of lipases                                                                                                                                                                                                                                                                            | [26]       |
| <i>Escherichia coli</i> DH5 $\alpha$                | Host for recombinant plasmids<br>F <sup>-</sup> $\phi$ 80 <i>lacZ</i> Δ <i>M15</i> Δ( <i>lacZ</i> YA- <i>argF</i> )U169 <i>recA1</i><br><i>endA1 hsdR17</i> (r <sub>K</sub> <sup>-</sup> , m <sub>K</sub> <sup>+</sup> ) <i>phoA supE44</i> λ <sup>-</sup> <i>thi-1</i><br><i>gyrA96 relA1</i> | [101]      |
| <i>Rhodococcus</i> sp. T104 KACC 21099              | Host for gene expression (Kn <sup>s</sup> )                                                                                                                                                                                                                                                    | [102]      |
| <i>Rhodococcus</i> sp. T104 KACC 21099 pENV19SeLipA | <i>Rhodococcus</i> sp. T104 KACC 21099 recombinant strain harboring the plasmid pENV19SeLipA                                                                                                                                                                                                   | This study |
| <i>Rhodococcus</i> sp. T104 KACC 21099 pENV19SeLipB | <i>Rhodococcus</i> sp. T104 KACC 21099 recombinant strain harboring the plasmid pENV19SeLipB                                                                                                                                                                                                   | This study |
| <i>Rhodococcus</i> sp. T104 KACC 21099 pENV19SeLipC | <i>Rhodococcus</i> sp. T104 KACC 21099 recombinant strain harboring the plasmid pENV19SeLipC                                                                                                                                                                                                   | This study |
| <i>Rhodococcus</i> sp. T104 KACC 21099 pENV19SeLipD | <i>Rhodococcus</i> sp. T104 KACC 21099 recombinant strain harboring the plasmid pENV19SeLipD                                                                                                                                                                                                   | This study |
| <b>Plasmids</b>                                     |                                                                                                                                                                                                                                                                                                |            |
| pENV19                                              | Shuttle vector for <i>E. coli</i> - <i>Rhodococcus</i> with the constitutive <i>perme</i> * promoter (5.1 Kb, Kn <sup>R</sup> pAL5000ori <i>perme</i> * ColE1ori)                                                                                                                              | [35,37,38] |
| pENV19SeLipA                                        | pENV19 containing <i>lipA</i> gene from <i>S. exfoliatus</i> DSMZ 41693                                                                                                                                                                                                                        | This study |
| pENV19SeLipB                                        | pENV19 containing <i>lipB</i> gene from <i>S. exfoliatus</i> DSMZ 41693                                                                                                                                                                                                                        | This study |
| pENV19SeLipC                                        | pENV19 containing <i>lipC</i> gene from <i>S. exfoliatus</i> DSMZ 41693                                                                                                                                                                                                                        | This study |
| pENV19SeLipD                                        | pENV19 containing <i>lipPs</i> gene from <i>S. exfoliatus</i> DSMZ 41693                                                                                                                                                                                                                       | This study |
| <b>Primers</b>                                      |                                                                                                                                                                                                                                                                                                |            |
| Sequence (5'→3') <sup>#</sup>                       |                                                                                                                                                                                                                                                                                                |            |
| SeLipAFWsp                                          | GCTCTAGAGAGGACGACTCCGTCATGAAACGACAC                                                                                                                                                                                                                                                            | This study |
| SeLipAREV                                           | GGAATTCCTCAGGAACCGAGCGGGCAGGTG                                                                                                                                                                                                                                                                 | This study |
| SeLipBFWsp                                          | GCTCTAGAGGAGGTTCATGAGACTGTCC                                                                                                                                                                                                                                                                   | This study |
| SeLipBREV                                           | GGAATTCCTACGCCGCCCGTTG                                                                                                                                                                                                                                                                         | This study |
| SeLipCFWsp                                          | GCTCTAGACAGTCGTGGCTGGAACGACTGGTCCTGCAAGCCC                                                                                                                                                                                                                                                     | This study |
| SeLipCREV                                           | GGAATTCCTAGCCGATCACCAGAGAGGCAGGTGGTCGGGGTCTG                                                                                                                                                                                                                                                   | This study |
| SeLipDFW                                            | GCTCTAGAAGGAGTTCCTATGTCAGGGAG                                                                                                                                                                                                                                                                  | This study |
| SeLipDREV                                           | GGAATTCCTCAGGCCGTGGGACCGGGAATCTG                                                                                                                                                                                                                                                               | This study |

<sup>#</sup>The restriction sites *Xba*I and *Eco*RI are shown in bold, ribosomal binding site sequence is shown in italics, and the start and the stop codons are shown underlined.

**Table S2.** PCR conditions for amplification of lipase genes from *Streptomyces exfoliatus* DSMZ 41693.

| Step                                                                         | Temperature (°C) | Time       |
|------------------------------------------------------------------------------|------------------|------------|
| 1. Denaturalization                                                          | 95               | 3 minutes  |
| 2. Denaturalization                                                          | 95               | 30 seconds |
| 3. Annealing                                                                 | 83               | 30 seconds |
| 4. Extension                                                                 | 72               | 55 seconds |
| 5. Repeat 17 cycles steps 2-4 decreasing 1 °C annealing temperature by cycle |                  |            |
| 6. Denaturalization                                                          | 95               | 30 seconds |
| 7. Annealing                                                                 | 58-72            | 30 seconds |
| 8. Extension                                                                 | 72               | 55 seconds |
| 9. Repeat 20 cycles steps 6-8 increasing 1 s annealing time by cycle         |                  |            |
| 10. Extension                                                                | 72               | 10 minutes |

**Table S3.** pNP-ester hydrolytic specific activity in the culture broth of the recombinant strains.

| pNP-esters (number of carbon atoms in acyl chain) | Specific activity (IU/mg protein) |        |        |        |
|---------------------------------------------------|-----------------------------------|--------|--------|--------|
|                                                   | SeLipA                            | SeLipB | SeLipC | SeLipD |
| pNP-acetate (C2)                                  | n.d.                              | n.d.   | n.d.   | n.d.   |
| pNP-butyrate (C4)                                 | 0.9                               | n.d.   | 0.9    | n.d.   |
| pNP-valerate (C5)                                 | 2.5                               | n.d.   | 2.5    | n.d.   |
| pNP-hexanoate (C6)                                | 3.1                               | n.d.   | 6.5    | n.d.   |
| pNP-octanoate (C8)                                | 4.8                               | n.d.   | 13.3   | n.d.   |
| pNP-decanoate (C10)                               | 8.0                               | n.d.   | 17.2   | n.d.   |
| pNP-laurate (C12)                                 | 7.1                               | n.d.   | 12.8   | n.d.   |
| pNP-myristate (C14)                               | 4.8                               | n.d.   | 9.5    | n.d.   |
| pNP-palmitate (C16)                               | 5.3                               | n.d.   | 12     | n.d.   |
| pNP-stearate (C18)                                | 4.6                               | n.d.   | 7.8    | n.d.   |

n.d.: not detected

**Table S4.** Purification of SeLipC produced by *Rhodococcus* pENV19SeLipC by hydrophobic interaction chromatography (HIC).

| Step                                                  | V (mL) | Activity (IU) | Protein concentration (mg/mL) | Total protein (mg) | Specific activity (IU/mg) | Purification factor (fold) | Yield (%) |
|-------------------------------------------------------|--------|---------------|-------------------------------|--------------------|---------------------------|----------------------------|-----------|
| Broth                                                 | 700    | 1356          | 0.163                         | 114.1              | 12                        | 1                          | 100       |
| Broth (NH <sub>4</sub> ) <sub>2</sub> SO <sub>4</sub> | 740    | 1202          | 0.151                         | 111.7              | 11                        | 0.9                        | 89        |
| HIC                                                   | 92     | 245.7         | 0.023                         | 2.12               | 116.6                     | 3.6                        | 17.2      |
| Dialysis                                              | 140    | 240.8         | 0.007                         | 1.04               | 232.4                     | 7.2                        | 16.9      |

**Table S5.** Effect of different reducing agents on SeLipC activity.

| Chemical reagent     | Concentration | Residual activity (%) |
|----------------------|---------------|-----------------------|
| No addition          | -             | 100.0 ± 7.2           |
| Dithiothreitol (DTT) | 1 mM          | 94.9 ± 6.0            |
|                      | 10 mM         | 101.6 ± 5.7           |
| 2-Mercaptoethanol    | 1 mM          | 99.8 ± 1.9            |
|                      | 10 mM         | 99.4 ± 2.9            |

**Table S6.** Effect of chemical modification with PMSF on SeLipC.

| Chemical reagent                                           | Concentration | Residual activity (%) |
|------------------------------------------------------------|---------------|-----------------------|
| <i>In absence of substrate (active site not protected)</i> |               |                       |
| No addition                                                | -             | 100 ± 2.6             |
| PMSF                                                       | 1 mM          | 84.7 ± 3.5            |
|                                                            | 10 mM         | 51.2 ± 5.5            |
| <i>In presence of substrate (active site protected)</i>    |               |                       |
| No addition                                                | -             | 100 ± 0.5             |
| PMSF                                                       | 1 mM          | 100.5 ± 1.2           |
|                                                            | 10 mM         | 90.0 ± 1.3            |

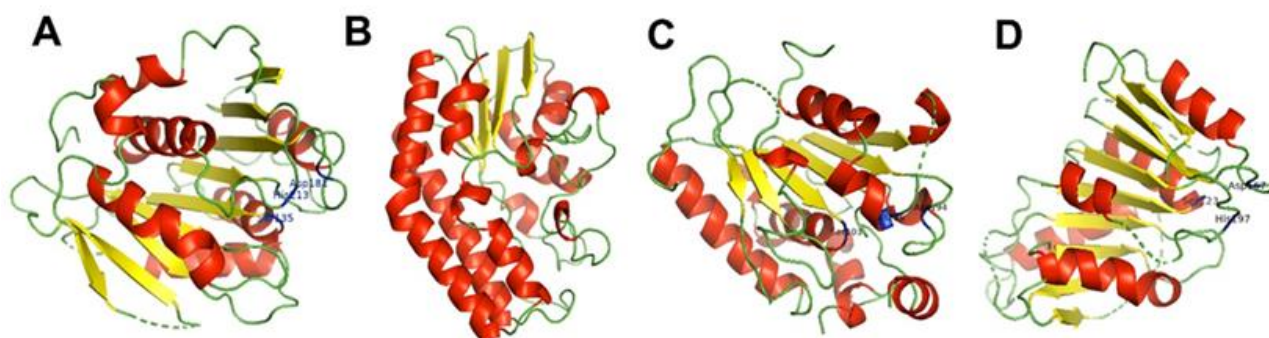**Figure S1.** Predicted 3D structures of hypothetical lipases from *Streptomyces exfoliatus* DSMZ 41693. **A.** SeLipA; **B.** SeLipB; **C.** SeLipC; **D.** SeLipD. Models were obtained by RoseTTAFold program [29] and their structures were visualized by PyMOL program (Schrodinger, LLC, version 2.5).

gi|639917083 Mass: 31194 Score: 659 Expect: 1.3e-066 Matches: 21  
lipase [*Streptomyces exfoliatus*]

| Query | Start | End | Observed  | Mr(expt)  | Mr(calc)  | ppm   | M | Score | Peptide                                                   |
|-------|-------|-----|-----------|-----------|-----------|-------|---|-------|-----------------------------------------------------------|
| 59    | 84    | 109 | 2896.5251 | 2895.5178 | 2895.4418 | 26.2  | 0 |       | R.GYCVFSLDYGQLPNVPFFHGLGPIAK.S                            |
| 5     | 110   | 120 | 1266.5919 | 1265.5846 | 1265.5888 | -3.28 | 0 |       | K.SAEQLDAYVDR.V                                           |
| 6     | 110   | 120 | 1266.5919 | 1265.5846 | 1265.5888 | -3.28 | 0 | 66    | K.SAEQLDAYVDR.V                                           |
| 72    | 110   | 143 | 3544.8044 | 3543.7971 | 3543.6722 | 35.2  | 1 |       | K.SAEQLDAYVDRVLAATGAPEADLVGHSQGGMMMPR.W + 2 Oxidation (M) |
| 39    | 121   | 143 | 2297.1086 | 2296.1013 | 2296.0940 | 3.19  | 0 |       | R.VLAATGAPEADLVGHSQGGMMMPR.W + 2 Oxidation (M)            |
| 56    | 121   | 147 | 2887.5613 | 2886.5540 | 2886.4157 | 47.9  | 1 |       | R.VLAATGAPEADLVGHSQGGMMMPRWYLK.F + 2 Oxidation (M)        |
| 48    | 148   | 175 | 2836.6228 | 2835.6155 | 2835.5495 | 23.3  | 1 |       | K.FLGGAKEVNTLVGIAPDNHGTLLGLTK.L                           |
| 32    | 155   | 175 | 2134.1792 | 2133.1719 | 2133.1794 | -3.50 | 0 |       | K.VNTLVGIAPDNHGTLLGLTK.L                                  |
| 33    | 155   | 175 | 2134.1792 | 2133.1719 | 2133.1794 | -3.50 | 0 | 69    | K.VNTLVGIAPDNHGTLLGLTK.L                                  |
| 67    | 176   | 206 | 3163.7524 | 3162.7451 | 3162.6489 | 30.4  | 0 |       | K.LLPYFPGAEDLISSATPGLADQIAGSAFITK.L                       |
| 68    | 176   | 206 | 3163.7524 | 3162.7451 | 3162.6489 | 30.4  | 0 | 112   | K.LLPYFPGAEDLISSATPGLADQIAGSAFITK.L                       |
| 3     | 207   | 218 | 1213.6143 | 1212.6070 | 1212.6099 | -2.35 | 0 |       | K.LNEGSDTVPGVR.Y                                          |
| 4     | 207   | 218 | 1213.6143 | 1212.6070 | 1212.6099 | -2.35 | 0 | 42    | K.LNEGSDTVPGVR.Y                                          |
| 27    | 219   | 234 | 1939.9414 | 1938.9341 | 1938.9476 | -6.94 | 0 |       | R.YHVIASQYDEVVTPYR.S                                      |
| 28    | 219   | 234 | 1939.9414 | 1938.9341 | 1938.9476 | -6.94 | 0 | 143   | R.YHVIASQYDEVVTPYR.S                                      |
| 29    | 219   | 234 | 1939.9414 | 1938.9341 | 1938.9476 | -6.94 | 0 | 152   | R.YHVIASQYDEVVTPYR.S                                      |
| 22    | 235   | 251 | 1859.9799 | 1858.9726 | 1858.9789 | -3.37 | 0 |       | R.SQFLSGPNVTNLIQDK.C                                      |
| 12    | 252   | 267 | 1755.8586 | 1754.8513 | 1754.8621 | -6.16 | 0 |       | K.CALDSEHVAIGTVDR.V                                       |
| 70    | 252   | 281 | 3276.6643 | 3275.6570 | 3275.6357 | 6.51  | 1 |       | K.CALDSEHVAIGTVDRVTFHEVANALDPAR.A                         |
| 9     | 268   | 281 | 1539.7820 | 1538.7747 | 1538.7841 | -6.12 | 0 |       | R.VTFHEVANALDPAR.A                                        |
| 10    | 268   | 281 | 1539.7820 | 1538.7747 | 1538.7841 | -6.12 | 0 | 70    | R.VTFHEVANALDPAR.A                                        |

**Figure S2.** Peptide mass fingerprinting of SeLipC obtained by MALDI-TOF analysis. The protein was identified as a lipase from *Streptomyces exfoliatus* (gi|639917083) after peptide matching process using MASCOT Software (Score 659).

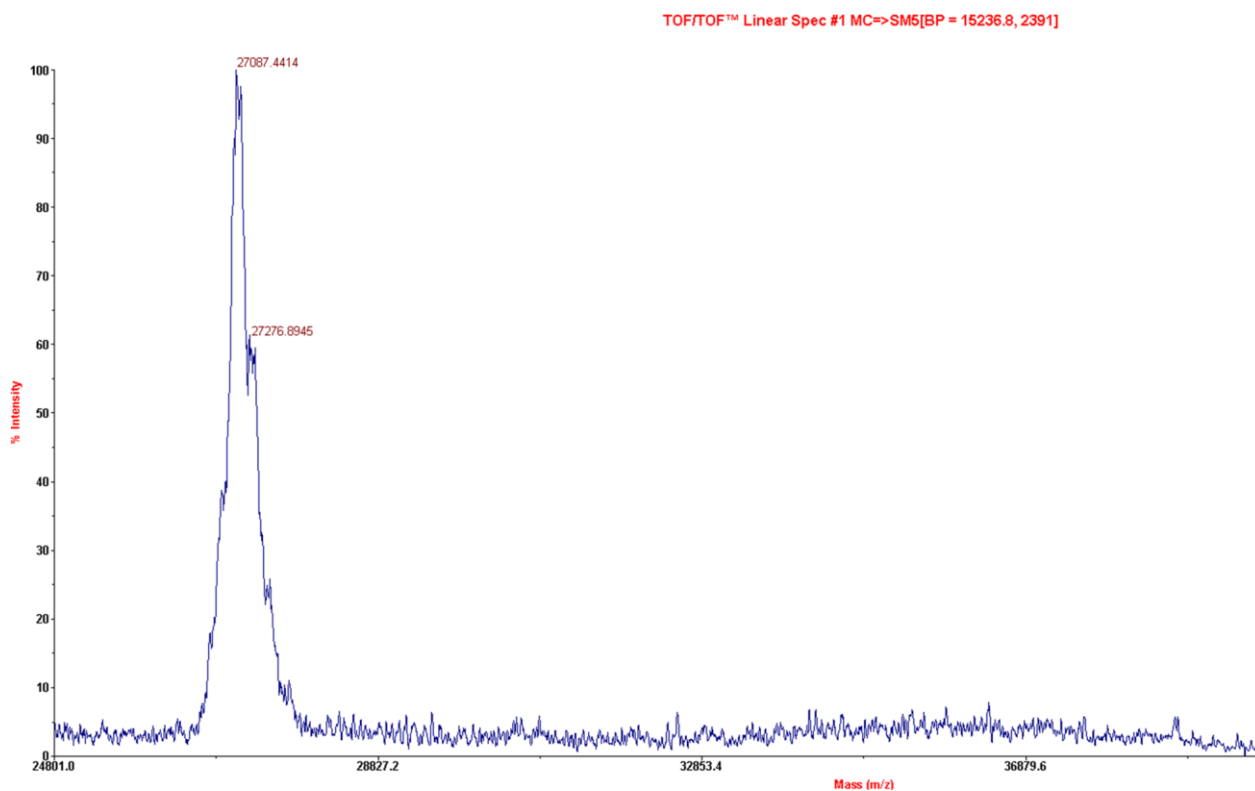

**Figure S3.** Determination of the molecular mass of SeLipC by MALDI-TOF. Mass spectrum recorded with 0.127 mg/mL of pure lipase.

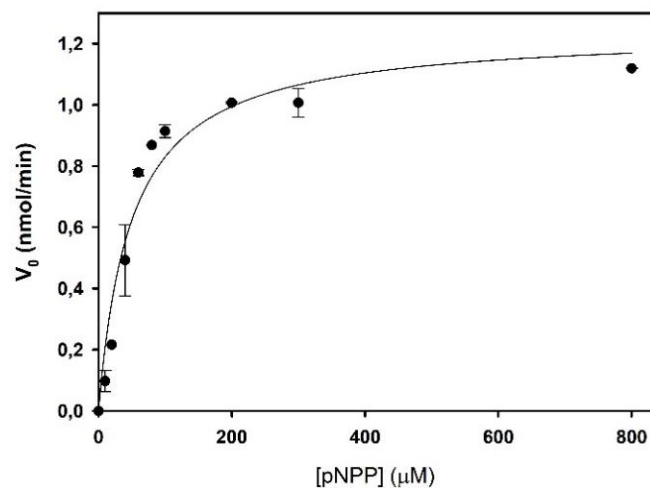

**Figure S4.** Michaelis-Menten hyperbola plot for the determination of kinetic parameters of SeLipC using pNPP as substrate. Conditions: 200  $\mu\text{L}$  assay volume, 0.05  $\mu\text{g/mL}$  of enzyme (1.81 nM), assay time 10 min, 37°C, 50 mM Tris HCl pH 8.0, 0.01% gum arabic and 0.02% sodium deoxycholate.  $K_M = 49.6 \pm 11.2 \mu\text{M}$  and  $V_{max} = 1.24 \pm 0.08 \times 10^{-3} \mu\text{moles/min}$  ( $k_{cat} = 57 \text{ s}^{-1}$  and  $k_{cat} / K_M = 1.15 \times 10^6 \text{ s}^{-1} \cdot \text{M}^{-1}$ ).

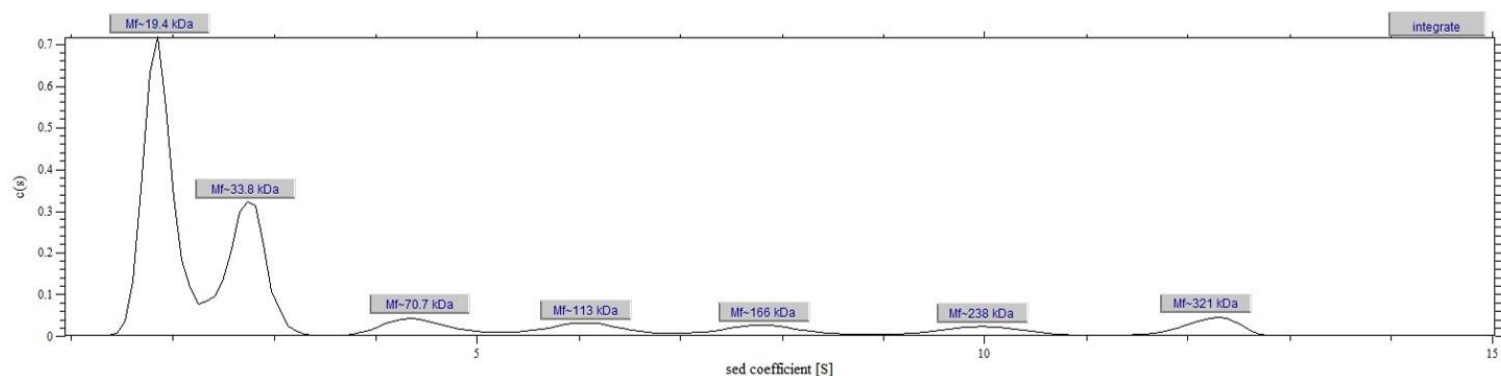

**Figure S5.** Analytical ultracentrifugation analysis of SeLipC:  $c(s)$  distribution as a function of sedimentation coefficient ( $S$ ). Experiment was performed with 0.320 mg/mL of pure lipase, and the presence of two main species with sedimentation coefficient ( $S$ ) values of 1.9 and 2.7 were observed. These values are compatible with the presence of monomers and dimers with spheroid oblate-shape in both forms.
